# Supplementary material for: Associations of Neighborhood Walkability with Sedentary Time in Nigerian Older Adults
Source: MDPI journal article supplement (doi:10.3390/ijerph16111879), 2019-05-28
Supplement: s1 [file s1]

**Table S1.** Associations between perceived neighbourhood environment attributes with sedentary time (min/day) on a weekday and a weekend day

| Environmental Attributes          | Effect         | Weekday-Environmental-Attributes Models |                   |           | Weekend-Environmental Attributes Models |                   |           |
|-----------------------------------|----------------|-----------------------------------------|-------------------|-----------|-----------------------------------------|-------------------|-----------|
|                                   |                | B                                       | 95% CI            | p-Value   | B                                       | 95% CI            | p-Value   |
| Residential density               | Main           | -0.285                                  | -0.584, 0.013     | 0.061     | -0.204                                  | -0.487, 0.080     | 0.159     |
|                                   | Women-specific | -                                       | -                 | -         | -                                       | -                 | -         |
|                                   | Men-specific   | -                                       | -                 | -         | -                                       | -                 | -         |
| Proximity to destinations         | Main           | -116.558                                | -159.694, -74.421 | <0.001 ** | -56.478                                 | -99.889, -13.070  | 0.011 *   |
|                                   | Women-specific | -109.231                                | -179.069, -39.394 | 0.003 *   | -                                       | -                 | -         |
|                                   | Men-specific   | -103.314                                | -158.053, -48.574 | <0.001 ** | -                                       | -                 | -         |
| Access to services and places     | Main           | -85.679                                 | -134.507, -36.851 | 0.001 *   | -25.154                                 | -73.987, -21.679  | 0.282     |
|                                   | Women-specific | -                                       | -                 | -         | -                                       | -                 | -         |
|                                   | Men-specific   | -                                       | -                 | -         | -                                       | -                 | -         |
| Street connectivity               | Main           | -10.687                                 | -49.480, 28.106   | 0.587     | -3.847                                  | -33.484, 41.178   | 0.839     |
|                                   | Women-specific | -6.092                                  | -54.901, -42.717  | 0.804     | -                                       | -                 | -         |
|                                   | Men-specific   | 46.555                                  | 2.575, 90.536     | 0.038 *   | -                                       | -                 | -         |
| Walking infrastructure and safety | Main           | -35.514                                 | -78.507, 10.200   | 0.587     | -26.559                                 | -69.142, 16.023   | 0.220     |
|                                   | Women-specific | -3.505                                  | -54.500, 47.490   | 0.892     | -                                       | -                 | -         |
|                                   | Men-specific   | -39.178                                 | -77.598, -0.758   | 0.046 *   | -                                       | -                 | -         |
| Aesthetics                        | Main           | -11.103                                 | -50.000, 27.793   | 0.574     | -11.656                                 | -49.027, 25.715   | 0.539     |
|                                   | Women-specific | -                                       | -                 | -         | -                                       | -                 | -         |
|                                   | Men-specific   | -                                       | -                 | -         | -                                       | -                 | -         |
| Traffic safety                    | Main           | -89.813                                 | -131.063, -48.571 | 0.001 *   | -74.184                                 | 113.693, -34.601  | <0.001 ** |
|                                   | Women-specific | -51.597                                 | -98.427, -4.766   | 0.031 *   | -59.298                                 | -106.641, -11.955 | 0.015 *   |
|                                   | Men-specific   | -79.234                                 | -126.418, -32.050 | 0.001 *   | -62.469                                 | -106.189, -18.749 | 0.006 *   |
| Safety from crime                 | Main           | -50.339                                 | -78.826, -21.853  | 0.001 *   | -25.684                                 | -53.398, 0.029    | 0.048 *   |
|                                   | Women-specific | -28.280                                 | -58.665, 2.105    | 0.068     | -                                       | -                 | -         |
|                                   | Men-specific   | -20.295                                 | -46.856, 2.625    | 0.132     | -                                       | -                 | -         |
| Overall walkability index         | Main           | -10.981                                 | -16.897, -5.065   | <0.001 ** | -7.836                                  | -13.540, -2.132   | 0.007 *   |
|                                   | Women-specific | -                                       | -                 | -         | -                                       | -                 | -         |
|                                   | Men-specific   | -                                       | -                 | -         | -                                       | -                 | -         |

B = regression coefficient; 95% CI = 95% confidence intervals; - =Not applicable because no significant moderating effect of sex was found. For environmental attributes with significant sex moderating effects, sex-specific associations (men- and women-specific) are reported. All regression coefficients were adjusted for participants' age, sex, marital status, education, employment and neighbourhood types.
